# Supplementary material for: Environmental and social impact assessment in healthcare business planning: a national survey of NHS trusts in England
Source: bioRxiv or medRxiv preprint supplement (doi:10.1101/2024.11.13.24317090), 2024-11-15
Supplement: Supplementary file [file media-1.pdf]

Appendix 1 – Questions included in the survey sent to trusts who said they practised environmental and social impact assessment (ESIA)

| <b>Questions about content and format of ESIA</b>                                | <b>Questions about the process of using the ESIA</b>                                                   |
|----------------------------------------------------------------------------------|--------------------------------------------------------------------------------------------------------|
| Was it based on a particular model or adapted from other tools?                  | Is it mandatory to complete?                                                                           |
| Does it involve a screening tool?                                                | Who reviews the completed ESIA?                                                                        |
| Is it separate to the main business case proposal form?                          | Does it require formal approval?                                                                       |
| Are the questions categorised into environmental and/or social themes?           | Is it followed up any time after business case approval?                                               |
| In what format are the answers? (Free text, scores/scales, or quantifiable data) | Has the introduction of the ESIA changed business planning practice, and if so has this been measured? |
| Does it ask for mitigation plans?                                                | What were the barriers and challenges when embedding this into practice, if any?                       |
