# Supplementary material for: Environmental and social impact assessment in healthcare business planning: a national survey of NHS trusts in England
Source: bioRxiv or medRxiv preprint supplement (doi:10.1101/2024.11.13.24317090), 2024-11-15
Supplement: Supplementary file [file media-2.pdf]

# Appendix 2 – A draft Environmental and Social Impact Assessment tool for business cases in Oxford University Hospitals NHS Foundation Trust

Oxford University Hospitals NHS Foundation Trust

## Environmental and social impact assessment

Business case title: \_\_\_\_\_

Business case authors: \_\_\_\_\_

|               | Category                     | OJH strategic theme | Short-term impact                                   | Long-term impact | Actions to mitigate negative impacts and enhance positive impacts (SMART objectives) | Considerations                                                                                                                                                                                                       | Resources                                                                                                                                |
|---------------|------------------------------|---------------------|-----------------------------------------------------|------------------|--------------------------------------------------------------------------------------|----------------------------------------------------------------------------------------------------------------------------------------------------------------------------------------------------------------------|------------------------------------------------------------------------------------------------------------------------------------------|
| Environmental | ENERGY                       |                     | Neutral                                             | Positive         |                                                                                      | <ul style="list-style-type: none"> <li>Fossil fuels, electricity and battery usage</li> <li>Energy efficient estates</li> <li>Renewable energy</li> </ul>                                                            | <a href="#">Greening the business case</a><br><a href="#">Delivering a net-zero NHS</a><br>xxxxx@xxxxx (Head of Sustainability)          |
|               | WATER                        |                     | Negative                                            | Neutral          |                                                                                      | <ul style="list-style-type: none"> <li>Water consumption: low water efficiency equipment, leaks, landscape watering, kitchens/bathrooms/sinks</li> <li>Substance disposal into water</li> </ul>                      | xxxxx@xxxxx (Head of Sustainability)                                                                                                     |
|               | WASTE                        |                     | Choose an item.                                     | Choose an item.  |                                                                                      | <ul style="list-style-type: none"> <li>Amount and type of waste generated</li> <li>Waste segregation and recycling</li> </ul>                                                                                        | xxxxx@xxxxx (Waste management)                                                                                                           |
|               | TRAVEL                       |                     | Choose an item.                                     | Choose an item.  |                                                                                      | <ul style="list-style-type: none"> <li>Patient travel: care closer to home, fewer/joint appointments</li> <li>Business travel, NHS fleet</li> <li>Staff commute</li> </ul>                                           | <a href="#">Delivering a net-zero NHS</a><br>xxxxx@xxxxx (Green travel and transport manager)                                            |
|               | POLLUTION & BIODIVERSITY     |                     | Choose an item.                                     | Choose an item.  |                                                                                      | <ul style="list-style-type: none"> <li>Air and water pollution</li> <li>Indoor air pollution</li> <li>Green spaces</li> </ul>                                                                                        | <a href="#">Health matters: air pollution</a><br><a href="#">Improving access to green space</a><br>xxxxx@xxxxx (Head of Sustainability) |
|               | DIGITAL TRANSFORMATION       |                     | Choose an item.                                     | Choose an item.  |                                                                                      | <ul style="list-style-type: none"> <li>Using virtual platforms to reduce paper, travel, energy and time</li> <li>Sustainable use of digital devices</li> <li>Digital patient platforms, digital inclusion</li> </ul> | xxxxx@xxxxx (Digital and information)                                                                                                    |
|               | PROCUREMENT                  |                     | Choose an item.                                     | Choose an item.  |                                                                                      | <ul style="list-style-type: none"> <li>Whole life costs</li> <li>Local, ethical, sustainable suppliers</li> <li>Greener catering</li> </ul>                                                                          | Note: social value evaluation included in procurement tenders<br><a href="#">Delivering a net-zero NHS</a><br>Ext XXXXX (Procurement)    |
| Social        | HEALTH PROMOTION             |                     | Choose an item.                                     | Choose an item.  |                                                                                      | <ul style="list-style-type: none"> <li>Disease prevention and health promotion</li> <li>Promoting independence</li> <li>Reducing avoidable hospital/residential care admissions</li> </ul>                           | <a href="#">OJH Here for Health</a><br>xxxxx@xxxxx (Health promotion)                                                                    |
|               | COVID-19 RECOVERY            |                     | Choose an item.                                     | Choose an item.  |                                                                                      | <ul style="list-style-type: none"> <li>Supporting individuals affected by Covid-19</li> <li>Supporting businesses affected by Covid-19</li> <li>Supporting clinical services affected by Covid-19</li> </ul>         |                                                                                                                                          |
|               | TACKLING ECONOMIC INEQUALITY |                     | Choose an item.                                     | Choose an item.  |                                                                                      | <ul style="list-style-type: none"> <li>Creating new jobs and skills</li> <li>Increasing supply chain diversity, resilience and capacity</li> <li>Supporting small and local businesses</li> </ul>                    | Anchor steering group<br>xxxxx@xxxxx (Workforce)                                                                                         |
|               | WELLBEING                    |                     | Choose an item.                                     | Choose an item.  |                                                                                      | <ul style="list-style-type: none"> <li>6 domains of wellbeing: emotional &amp; psychological, physical, social, financial, occupational &amp; intellectual, environmental</li> <li>Wellbeing champion</li> </ul>     | <a href="#">OJH wellbeing</a><br>xxxxx@xxxxx (Wellbeing)                                                                                 |
|               | EQUAL OPPORTUNITIES          |                     | Please complete separate Equality Impact Assessment |                  |                                                                                      |                                                                                                                                                                                                                      |                                                                                                                                          |

|                |              |                            |
|----------------|--------------|----------------------------|
| Date reviewed: | Reviewed by: | Follow up: Y/N             |
| Action plan:   |              | Date of planned follow up: |

Created by Haruna Takahashi

\*Where a cell asks to “Choose an item”, the business case author will select from “Positive”, “Neutral” or “Negative” impact. Energy and water categories illustrate this as examples.
